# Supplementary material
Source: Springer Nature journal article supplement (https://www.springermedizin.de/resource/supplementary/12889_2007_1118_MOESM3_ESM.pdf/9502490)
Supplement: MOESM3 [file 9502490]

# Age group Men

## 65-69

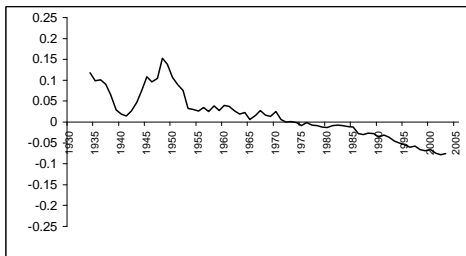

## 70-74

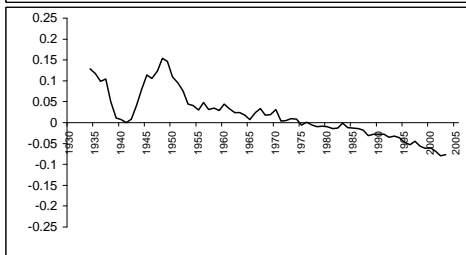

## 75-79

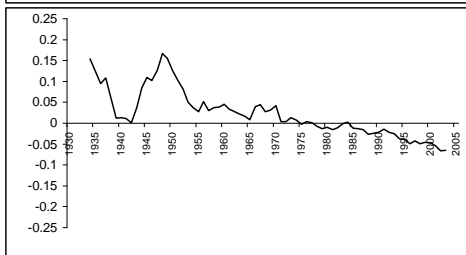

## 80-84

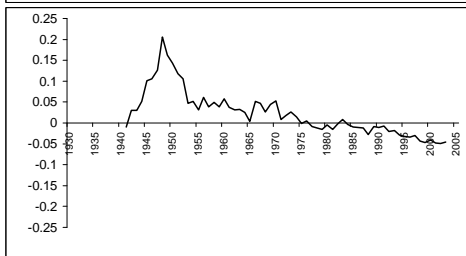

## 85+

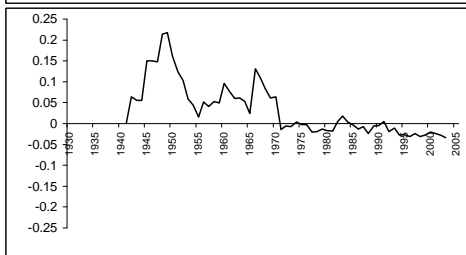

Proportional change, 5 year moving average

# Women

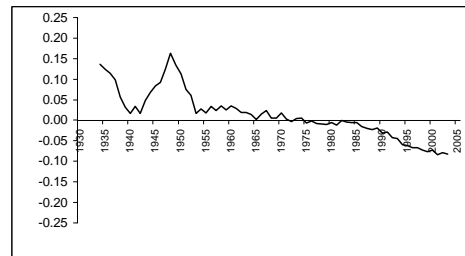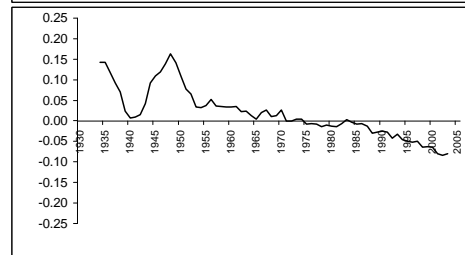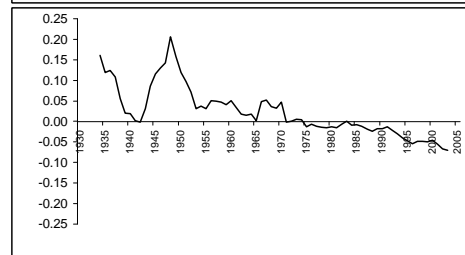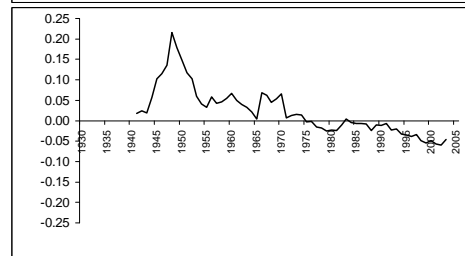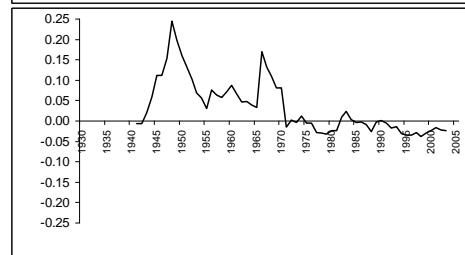

Proportional change, 5 year moving average

Proportional change refers to 
$$\frac{year_{n+1} - year_n}{year_n}$$
